# Supplementary material
Source: PubMed Central journal article supplement (PMC5341745)
Supplement: NIHMS850555-supplement-supplement_1.pdf [file NIHMS850555-supplement-supplement_1.pdf]

**Supplementary Table 1.** Treatment Duration by Regimen

| Duration, wk | All patients |      | Genotype 1, %     |                   |                  |                   | Genotype 2, %     |                  | Genotype 3, %    |                  |                  | Genotype 4, %   |  |
|--------------|--------------|------|-------------------|-------------------|------------------|-------------------|-------------------|------------------|------------------|------------------|------------------|-----------------|--|
|              | n            | %    | LDV/SOF           | LDV/SOF+RIBA      | PrOD             | PrOD+RIBA         | SOF+RIBA          | LDV/SOF+RIBA     | SOF+PEG+RIBA     | SOF+RIB          | LDV/SOF±RIBA     | PrOD±RIBA       |  |
| n            | 17,487       |      | 8140 <sup>a</sup> | 2692 <sup>a</sup> | 776 <sup>a</sup> | 2366 <sup>a</sup> | 2131 <sup>a</sup> | 392 <sup>a</sup> | 140 <sup>a</sup> | 715 <sup>a</sup> | 103 <sup>a</sup> | 32 <sup>a</sup> |  |
| 0 to <2      | 15           | 0.09 | 0.1               | 0                 | 0.1              | 0                 | 0.05              | 0                | 1.4              | 0.4              | 0                | 0               |  |
| 2            | 424          | 2.4  | 1.9               | 1.7               | 4.1              | 4.3               | 2.5               | 2.3              | 0.7              | 3.2              | 2.9              | 3.1             |  |
| >2 to <4     | 15           | 0.09 | 0.07              | 0                 | 0.0              | 0.04              | 0.3               | 0                | 0                | 0.1              | 0                | 0               |  |
| 4            | 540          | 3.0  | 2.9               | 1.6               | 4.1              | 4.0               | 3.6               | 5.1              | 2.9              | 4.0              | 1.9              | 0               |  |
| >4 to <8     | 104          | 0.6  | 0.7               | 0.3               | 0.5              | 0.5               | 0.4               | 1.5              | 0.7              | 0.7              | 0.9              | 0               |  |
| 0 to <8      | 1098         | 6.3  | 5.7               | 3.6               | 8.9              | 8.8               | 7.0               | 8.9              | 5.7              | 8.5              | 5.8              | 3.1             |  |
| 8            | 2449         | 14   | 27                | 2.4               | 2.2              | 3.1               | 2.2               | 3.3              | 0.7              | 1.2              | 4.8              | 0               |  |
| >8 to <12    | 412          | 2.4  | 2.2               | 2.2               | 2.2              | 2.8               | 3.4               | 1.8              | 3.6              | 0.8              | 3.9              | 0               |  |
| 12           | 10,609       | 61   | 50                | 78                | 81               | 77                | 66                | 78               | 74               | 3.2              | 68               | 88              |  |
| >12 to 16    | 1175         | 6.7  | 4.3               | 7                 | 5.0              | 5.5               | 18                | 6.1              | 9.3              | 3.9              | 7.8              | 6.3             |  |
| >16 to 20    | 165          | 1.0  | 0.7               | 1.1               | 0.1              | 0.6               | 1.7               | 0                | 0                | 4.2              | 1.0              | 3.1             |  |
| >20 to <24   | 112          | 0.6  | 0.5               | 0.4               | 0.1              | 0.2               | 0.1               | 0.5              | 0                | 7.3              | 0                | 0               |  |
| ≥24          | 1467         | 8.4  | 9.0               | 5.5               | 0                | 1.8               | 0.6               | 1.8              | 7.1              | 71               | 8.7              | 0               |  |

<sup>a</sup>n.

**Supplementary Table 2.** Sustained Virologic Response Rates in Genotype 1–Infected Patients by Subgenotype 1a/1b, Cirrhosis, Prior Treatment and Duration of Treatment

|                          | LDV/SOF |                  | LDV/SOF+ RIBA |                  | PrOD |                  | PrOD + RIBA |                  |
|--------------------------|---------|------------------|---------------|------------------|------|------------------|-------------|------------------|
|                          | n       | SVR, % (95 CI)   | n             | SVR, % (95 CI)   | n    | SVR, % (95 CI)   | n           | SVR, % (95 CI)   |
| Genotype 1a all patients | 4723    | 92.3 (91.5–93.0) | 1736          | 91.6 (90.2–92.9) | 23   | 78.3 (55.2–91.3) | 1500        | 91.7 (90.2–93.0) |
| Treatment-naïve          |         |                  |               |                  |      |                  |             |                  |
| No cirrhosis             |         |                  |               |                  |      |                  |             |                  |
| All durations            | 2870    | 92.8 (91.8–93.7) | 378           | 96.6 (94.2–98.0) |      | NA               | 879         | 90.8 (88.7–92.5) |
| 12 wk                    | 1413    | 95.7 (94.5–96.6) | 291           | 98.6 (96.4–99.5) |      | NA               | 725         | 95.0 (93.2–96.4) |
| 24 wk                    |         |                  |               |                  |      | NA               |             |                  |
| Cirrhosis                |         |                  |               |                  |      |                  |             |                  |
| All durations            | 745     | 89.8 (87.4–91.8) | 428           | 89.0 (85.7–91.7) |      | NA               | 249         | 93.6 (89.7–96.0) |
| 12 wk                    | 527     | 91.7 (89.0–93.7) | 341           | 91.2 (87.7–93.8) |      | NA               | 199         | 95.5 (91.5–97.6) |
| 24 wk                    | 95      | 93.7 (86.5–97.2) | 19            | 94.7 (66.2–99.4) |      | NA               |             | NA               |
| Treatment-experienced    |         |                  |               |                  |      |                  |             |                  |
| No cirrhosis             |         |                  |               |                  |      |                  |             |                  |
| All durations            | 761     | 93.4 (91.4–95.0) | 374           | 94.7 (91.8–96.5) |      | NA               | 285         | 93.0 (89.3–95.4) |
| 12 wk                    | 488     | 96.7 (94.7–98.0) | 293           | 94.9 (91.7–96.9) |      | NA               | 224         | 94.6 (90.8–96.9) |
| 24 wk                    | 95      | 94.7 (87.8–97.8) |               |                  |      | NA               |             |                  |
| Cirrhosis                |         |                  |               |                  |      |                  |             |                  |
| All durations            | 347     | 90.8 (87.2–93.4) | 556           | 88.3 (85.4–90.7) |      | NA               | 87          | 92.0 (83.9–96.2) |
| 12 wk                    | 75      | 90.7 (81.4–95.6) | 421           | 88.8 (85.4–91.5) |      | NA               | 58          | 96.6 (86.7–99.2) |
| 24 wk                    | 205     | 94.1 (89.9–96.7) | 60            | 91.7 (81.1–96.6) |      | NA               |             | NA               |
| Genotype 1b all patients | 1768    | 93.3 (92.1–94.4) | 566           | 93.6 (91.3–95.4) | 627  | 95.2 (93.2–96.6) | 480         | 94.2 (91.7–95.9) |
| Treatment-naïve          |         |                  |               |                  |      |                  |             |                  |
| No cirrhosis             |         |                  |               |                  |      |                  |             |                  |
| All durations            | 1095    | 94.1 (92.5–95.3) | 115           | 96.5 (91.0–98.7) | 462  | 96.1 (93.9–97.5) | 179         | 93.9 (89.2–96.6) |
| 12 wk                    | 436     | 95.2 (92.7–96.8) | 90            | 97.8 (91.3–99.5) | 400  | 97.8 (95.7–98.8) | 142         | 98.6 (94.5–99.7) |
| 24 wk                    |         |                  |               |                  |      |                  |             |                  |
| Cirrhosis                |         |                  |               |                  |      |                  |             |                  |
| All durations            | 252     | 90.9 (86.6–93.9) | 108           | 92.6 (85.7–96.3) | 30   | 96.7 (77.8–99.6) | 173         | 93.1 (88.1–96.0) |
| 12 wk                    | 173     | 93.6 (88.8–96.5) | 89            | 93.3 (85.6–97.0) | 24   | 100              | 133         | 100              |
| 24 weeks                 | 28      | 82.1 (62.1–92.8) |               | NA               |      | NA               |             | NA               |
| Treatment-experienced    |         |                  |               |                  |      |                  |             |                  |
| No cirrhosis             |         |                  |               |                  |      |                  |             |                  |
| All durations            | 284     | 94.4 (91.0–96.5) | 120           | 93.3 (87.1–96.7) | 125  | 92.0 (85.7–95.7) | 57          | 94.7 (84.4–98.4) |
| 12 wk                    | 183     | 95.6 (91.5–97.8) | 93            | 94.6 (87.5–97.8) | 104  | 99.0 (93.3–99.9) | 48          | 97.9 (85.8–99.7) |
| 24 wk                    | 31      | 100              |               |                  |      |                  |             |                  |
| Cirrhosis                |         |                  |               |                  |      |                  |             |                  |
| All durations            | 137     | 89.8 (83.4–93.9) | 223           | 92.8 (88.6–95.6) |      | NA               | 71          | 97.2 (89.1–99.3) |
| 12 wk                    | 38      | 100              | 179           | 91.6 (86.5–94.9) |      | NA               | 60          | 100              |
| 24 wk                    | 76      | 90.8 (81.6–95.6) |               | NA               |      | NA               |             | NA               |

NA, available; regimens with <20 patients. These are regimens not recommended for the specific subpopulation.

**Supplementary Table 3.** Sustained Virologic Response Rates by Genotype in Clinically Relevant Subpopulations

|                         | Genotype 1       | Genotype 2       | Genotype 3       | Genotype 4       |
|-------------------------|------------------|------------------|------------------|------------------|
| All patients            | 92.8 (92.3–93.2) | 86.2 (84.6–87.7) | 74.8 (72.2–77.3) | 89.6 (82.8–93.9) |
| No cirrhosis            | 93.6 (93.1–94.1) | 89.1 (87.4–90.6) | 81.6 (78.4–84.4) | 91.5 (83.7–95.7) |
| Cirrhosis               | 90.6 (89.7–91.5) | 77.3 (73.3–80.9) | 65.7 (61.2–69.8) | 83.9 (65.4–93.5) |
| FIB-4 score $\leq$ 3.25 | 93.5 (93.0–94.1) | 89.2 (87.3–90.9) | 83.8 (80.1–86.8) | 91.3 (83.4–95.6) |
| FIB-4 score $>$ 3.25    | 91.2 (90.3–92.1) | 80.8 (77.6–83.7) | 66.5 (62.5–70.4) | 84.4 (66.3–93.7) |
| HIV                     | 92.1 (89.6–94.0) | 91.1 (77.9–96.8) | 95.5 (70.4–99.5) | 90.0 (42.2–99.1) |
| Liver transplantation   | 95.7 (92.8–97.5) | 91.7 (69.8–98.1) | 88.2 (71.4–95.7) | 50.0 (n = 2)     |
| Treatment-naïve         | 92.8 (92.2–93.3) | 88.0 (86.3–89.6) | 77.5 (74.3–80.3) | 88.3 (79.9–93.4) |
| Treatment-experienced   | 92.6 (91.7–93.3) | 80.2 (76.2–83.6) | 69.2 (64.2–73.9) | 93.5 (76.1–98.5) |

NOTE. Values are % (95% CI) unless otherwise indicated.

**Supplementary Table 4.** Sustained Virologic Response Rates in Treatment-Experienced Patients According to Prior Treatment Regimen

|                      | Genotype 1 |                  | Genotype 2 |                  | Genotype 3 |                  |
|----------------------|------------|------------------|------------|------------------|------------|------------------|
|                      | n          | SVR, % (95% CI)  | n          | SVR, % (95% CI)  | n          | SVR, % (95% CI)  |
| Prior Interferon     | 3574       | 92.8 (91.9–93.6) | 413        | 80.1 (76.0–83.7) | 329        | 68.1 (62.8–72.9) |
| Prior Boceprevir     | 865        | 94.7 (93.0–96.0) | —          | —                | —          | —                |
| Prior Telaprevir     | 212        | 90.1 (85.2–93.5) | —          | —                | —          | —                |
| Prior SOF            | 592        | 88.7 (85.9–91.0) | 45         | 73.3 (58.0–84.5) | —          | —                |
| Prior Simeprevir+SOF | 277        | 87.0 (82.5–90.5) | —          | —                | —          | —                |
| Prior PrOD           | 62         | 96.8 (87.6–99.2) | —          | —                | —          | —                |
| Prior LDV/SOF        | 122        | 87.7 (80.5–92.5) | —          | —                | —          | —                |

**Supplementary Table 5.** Characteristics of Patients With or Without Available Hepatitis C Virus Viral Load Testing to Compute Sustained Virologic Response

| Characteristic                                       | SVR data          |                      |
|------------------------------------------------------|-------------------|----------------------|
|                                                      | Absent (n = 1603) | Present (n = 15,884) |
| Race/ethnicity, %                                    |                   |                      |
| White, non-Hispanic                                  | 47                | 53                   |
| Black, non-Hispanic                                  | 30                | 29                   |
| Hispanic                                             | 9.1               | 4.8                  |
| Asian/Pacific Islander/American Indian/Alaska Native | 1.3               | 1.6                  |
| Declined to answer, missing                          | 11.7              | 12.1                 |
| Treatment duration, %                                |                   |                      |
| 0 to <8 wk                                           | 25                | 4.4                  |
| 8 wk                                                 | 15                | 14                   |
| >8 to <12 wk                                         | 2.7               | 2.3                  |
| 12 wk                                                | 43                | 62                   |
| >12 to <24 wk                                        | 9.5               | 8.2                  |
| ≥24 wk                                               | 5.2               | 8.7                  |
| Treatment duration, d, mean (SD)                     | 71 (38)           | 87 (31)              |
| HCV genotype, %                                      |                   |                      |
| 1                                                    | 77                | 80                   |
| 2                                                    | 14                | 12                   |
| 3                                                    | 8.9               | 7.0                  |
| 4                                                    | 0.62              | 0.80                 |
| Age, y, mean (SD)                                    | 59.4 (7.8)        | 61.0 (6.3)           |
| Male, %                                              | 96.7              | 96.9                 |
| Treatment-experienced, %                             | 24                | 30                   |
| HCV RNA viral load >6 million IU/mL, %               | 20                | 18                   |
| HIV co-infection, %                                  | 3.4               | 4.1                  |
| Cirrhosis, %                                         | 30                | 30                   |
| Decompensated cirrhosis, %                           | 10.2              | 8.1                  |
| Hepatocellular carcinoma, %                          | 3.5               | 2.7                  |
| Liver transplantation, %                             | 1.7               | 2.3                  |
| Diabetes, %                                          | 26                | 30                   |
| Alcohol use or dependence, %                         | 51                | 43                   |
| Substance use disorder, %                            | 46                | 36                   |
| Depression, %                                        | 53                | 47                   |
| Post-traumatic stress disorder, %                    | 29                | 27                   |
| Anxiety/panic, %                                     | 39                | 34                   |
| Schizophrenia, %                                     | 6.3               | 5.3                  |
| Laboratory results, %                                |                   |                      |
| Anemia <sup>a</sup>                                  | 15.9              | 14.4                 |
| Platelet count <100 k/ $\mu$ L                       | 14.4              | 13.5                 |
| Creatinine >1.1 mg/dL                                | 18.7              | 19.9                 |
| Bilirubin >1.1 g/dL                                  | 16.0              | 13.8                 |
| Albumin <3.6 g/dL                                    | 21.3              | 20.3                 |
| INR >1.1                                             | 25.2              | 21.6                 |
| FIB-4 score >3.25, %                                 | 35.2              | 35.9                 |

<sup>a</sup>Anemia is defined as a hemoglobin concentration <13 g/dL in men or <12 g/dL in women.
